# Supplementary material for: Effects of Vine Water Status on Malate Metabolism and γ-Aminobutyric Acid (GABA) Pathway-Related Amino Acids in Marselan (Vitis vinifera L.) Grape Berries
Source: MDPI journal article supplement (doi:10.3390/foods12234191), 2023-11-21
Supplement: s1 [file s1]

**Supplementary Table S1** Irrigation amount of the three treatments

| Year | Month | Rainfall amount | CK                              |                                   | LWS                             |                                   | MWS                             |                                   |
|------|-------|-----------------|---------------------------------|-----------------------------------|---------------------------------|-----------------------------------|---------------------------------|-----------------------------------|
|      |       |                 | Amount of irrigation (L/plant ) | Total irrigation water (L/plant ) | Amount of irrigation (L/plant ) | Total irrigation water (L/plant ) | Amount of irrigation (L/plant ) | Total irrigation water (L/plant ) |
| 2021 | 6*    | 16.854          | 16.8                            |                                   | 9.4                             |                                   | 4.8                             |                                   |
|      | 7     | 6.082           | 85.4                            | 182.9                             | 51.3                            | 107                               | 22.6                            | 50.4                              |
|      | 8     | 26.478          | 51.9                            |                                   | 33.5                            |                                   | 17.8                            |                                   |
|      | 9     | 59.631          | 28.8                            |                                   | 12.8                            |                                   | 5.2                             |                                   |
| 2022 | 6*    | 30.410          | 5.5                             |                                   | 1.8                             |                                   | 0                               |                                   |
|      | 7     | 57.250          | 30.4                            | 106.8                             | 10.1                            | 48.6                              | 3.5                             | 25.3                              |
|      | 8     | 53.308          | 26.0                            |                                   | 13.9                            |                                   | 6.5                             |                                   |
|      | 9     | 13.882          | 44.9                            |                                   | 22.8                            |                                   | 15.3                            |                                   |

\*The amount of irrigation water was determined using a stress test conducted on June 18, 2021, and subsequently on June 26, 2022.

**Supplementary Table S2** List of primers for Real-Time PCR

| Gene name         | Primer | Sequence (5'-3')       |
|-------------------|--------|------------------------|
| <i>VvGADPH</i>    | F      | CACGGTCAGTGGAAAGCATCAT |
|                   | R      | CCTTGTCAGTGAACACACCAG  |
| <i>VvNAD-MDH1</i> | F      | ATTGGTGGATGCTGCTTTTC   |
|                   | R      | GCCTGGGACTTGTAGATGGA   |
| <i>VvNAD-MDH2</i> | F      | GTGATCACATACGCGATTGG   |
|                   | R      | CTGTGGCATCCATCTTTCCT   |
| <i>VvNADP-ME1</i> | F      | TGCTGTCAAGGTGATCAAGC   |
|                   | R      | AAAAATTGCACGACCCTGAG   |
| <i>VvNADP-ME2</i> | F      | TACCAAGGAGGTGGTTGAGG   |
|                   | R      | GGCACAAAAAGTTTGCCATT   |
| <i>VvNADP-ME3</i> | F      | CGGTCTGGGTTTGATCATCT   |
|                   | R      | CATACGCTTTAGCAGCCACA   |
| <i>VvPEPC1</i>    | F      | TGCTAGGCATGCTGAAACAC   |
|                   | R      | GCAACTCGGAAGGTATCCAA   |
| <i>VvPEPC2</i>    | F      | GTGCCTGCAAAAGTGTCTGA   |
|                   | R      | CAACTTCTTGGGGTCGTGTT   |
| <i>VvPEPC3</i>    | F      | TCGGATCCTATCGAGAATGG   |
|                   | R      | GCGGTTGCCATTGAGATTAT   |
| <i>VvPEPCK</i>    | F      | GTGACAATGGCGTGTCAAAC   |
|                   | R      | GGGATAGGATGCACGAGTGT   |
| <i>VvPK1</i>      | F      | ATGGCGAATATAGACATCGAG  |
|                   | R      | CCTCGATGTCTATATTCGCCAT |
| <i>VvPK2</i>      | F      | ATGGCGATGGAGAAGAAAACG  |
|                   | R      | CGTTTTCTTCTCCATCGCCAT  |

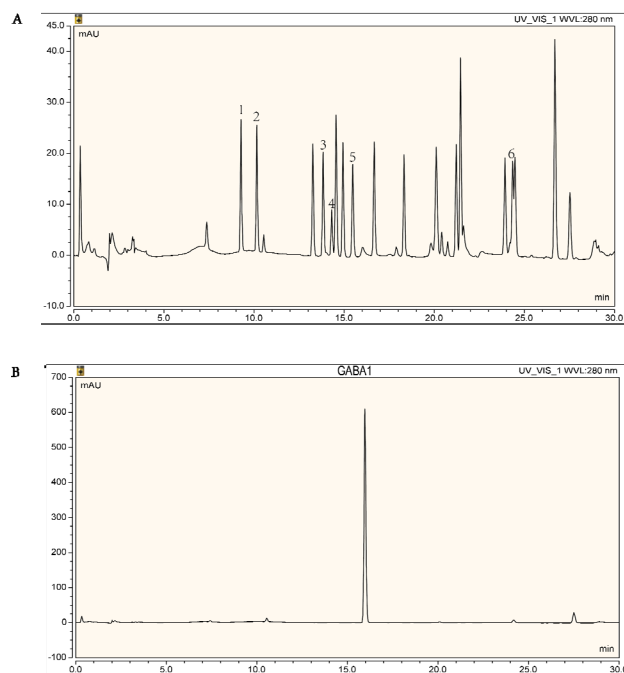

**Supplementary Figure S1** High-performance liquid chromatography (HPLC) chromatograms of the derivatives of amino acids, ammonium ion and biogenic amines at 280 nm, a standard solution (A) and  $\gamma$ -aminobutyric Acid (GABA) (B). Peak assignments of the **Figure S1A**: (1) Asp; (2) Glu; (3) Gly; (4) Arg; (5) Pro.
